# Supplementary material
Source: MDPI journal article supplement (https://www.mdpi.com/2079-6412/11/8/870)
Supplement: s1 [file s1]

# Supplementary Materials: The Microstructure and Mechanical and Corrosion Behaviors of Thermally Aged Z3CN20-09M Cast Stainless Steel for Primary Coolant Pipes of Nuclear Power Plants

Fei Xue <sup>1</sup>, Fangjie Shi <sup>1</sup>, Chuangju Zhang <sup>2</sup>, Qiaoling Zheng <sup>2</sup>, Dawei Yi <sup>3</sup>, Xiuqing Li <sup>4</sup> and Yefei Li <sup>2,\*</sup>

<sup>1</sup> Life management Center, Suzhou Nuclear Power Research Institute, Suzhou 215004, China; xuefei@cgnpc.com.cn (F.X.); shifangjie@cgnpc.com.cn (F.S.)

<sup>2</sup> State Key Laboratory for Mechanical Behavior of Materials, Xi'an Jiaotong University, Xi'an 710049, China; zchuangju@163.com (C.Z.); zhengql@xjtu.edu.cn (Q.Z.)

<sup>3</sup> College of Materials Science and Engineering, Xi'an University of Science and Technology, Xi'an 710054, China; yidawei19820608@163.com

<sup>4</sup> National Joint Engineering Research Center for Abrasion Control and Molding of Metal Materials, Henan University of Science and Technology, Luoyang 471023, China; li\_xq@sina.cn

\* Correspondence: liyefei@xjtu.edu.cn; Tel.: +86-29-82668606

**Citation:** Xue, F.; Shi, F.; Zhang, C.; Zheng, Q.; Yi, D.; Li, X.; Li, Y. The Microstructure and Mechanical and Corrosion Behaviors of Thermally Aged Z3CN20-09M Cast Stainless Steel for Primary Coolant Pipes of Nuclear Power Plants. *Coatings* **2021**, *11*, 870. <https://doi.org/10.3390/coatings11080870>

Received: 24 June 2021

Accepted: 19 July 2021

Published: 21 July 2021

**Publisher's Note:** MDPI stays neutral with regard to jurisdictional claims in published maps and institutional affiliations.

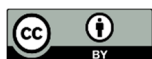

**Copyright:** © 2021 by the authors. Submitted for possible open access publication under the terms and conditions of the Creative Commons Attribution (CC BY) license (<http://creativecommons.org/licenses/by/4.0/>).

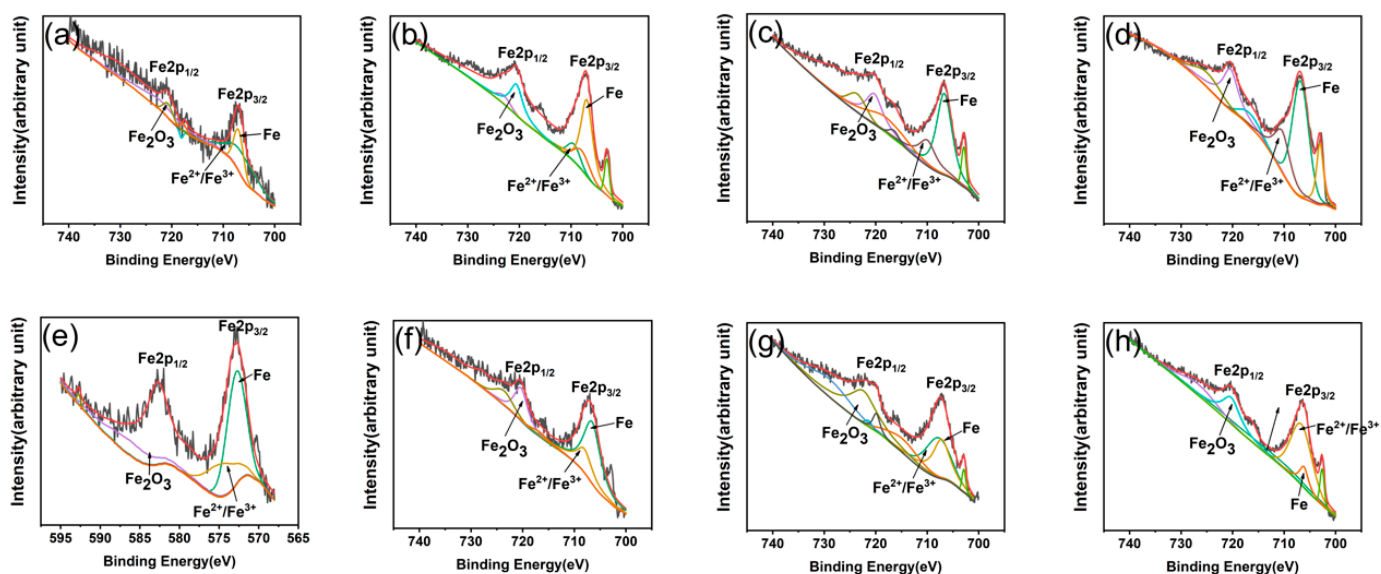

**Figure S1.** XPS energy spectrum of iron of Z3CN20-09M stainless steel at different aging time: (a) 0 h, (b) 272 h, (c) 544 h, (d) 1000 h, (e) 3000 h, (f) 6000 h, (g) 10,000h, (h) 15,000h.

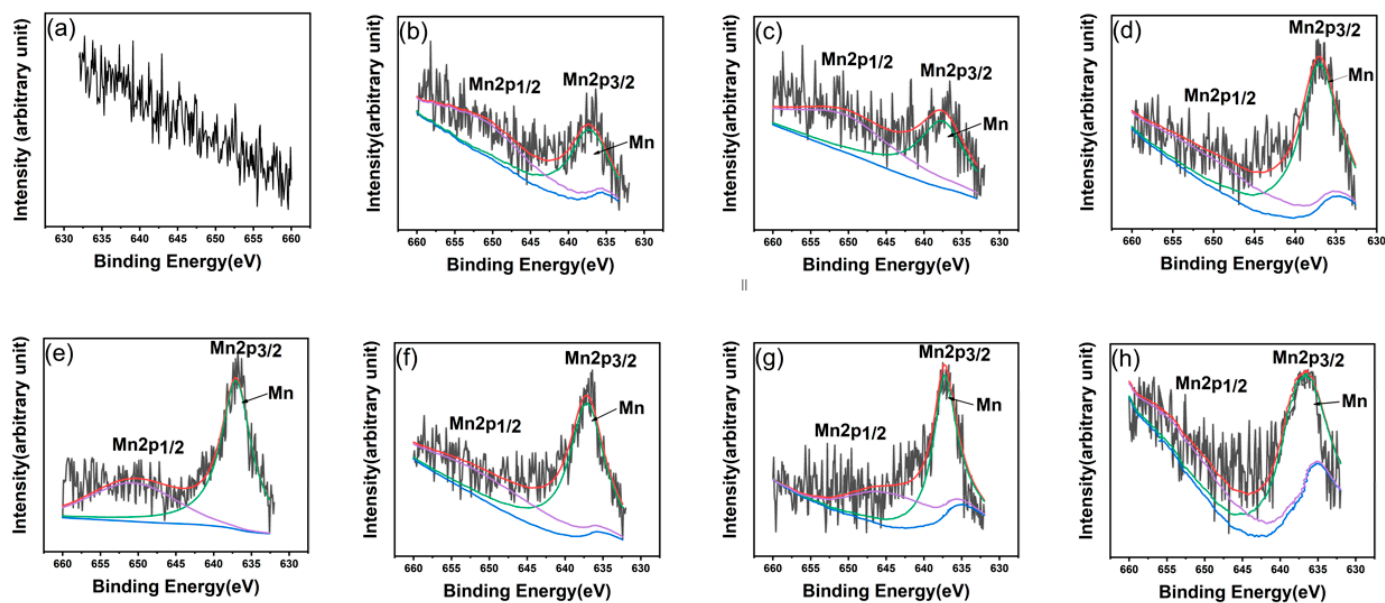

**Figure S2.** XPS energy spectrum of manganese of Z3CN20-09M stainless steel at different aging time: (a) 0 h, (b) 272 h, (c) 544 h, (d) 1000 h, (e) 3000 h, (f) 6000 h, (g) 10,000 h, (h) 15,000 h.
